# Supplementary material for: Assessing fishery footprints and the trade-offs between landings value, habitat sensitivity, and fishing impacts to inform marine spatial planning and an ecosystem approach
Source: Oxford University Press journal article supplement (doi:10.1093/icesjms/fss050), 2012-04-06
Supplement: fss050supp.doc [file fss050supp.doc]

**Supplementary material**

This supplementary material accompanies the paper:

Jennings, S., Lee, J. and Hiddink, J.G. 2011. Assessing fishery footprints and the tradeoffs between landings value, habitat sensitivity and fishing impacts to inform marine spatial planning and an ecosystem approach. ICES Journal of Marine Science

Figure S1. Trends in (a) distribution of effort (b) effort (c) catch value, (d, e) habitat sensitivity on the fishing grounds (rescaled to maximum sensitivity), (f, g) sensitivity of habitat trawled per unit fishing effort (SPUE), (h) sensitivity of habitat trawled per unit catch value (SPUV) and (i, j) sensitivity of habitat trawled per unit area trawled (SPUA) by UK (black line) and non UK (grey line) beam trawlers by quarter from 2006 to 2010. ‘*B*’ and ‘*P*’ in panel ‘h’ indicate biomass and production respectively.

Figure S2. Relative sensitivity of habitat in core and marginal areas of fishing grounds for UK (black line) and non UK (grey line) vessels. Each line in each panel represents a different year.

Table S1. Estimated changes in benthic biomass and production following beam trawling by UK and non UK vessels. Effort is expressed as a percentage of total effort and cells with highest rank effort are included first. Values in parentheses are total loss of biomass (*B*­loss; 103 t ash free dry mass) or production (*P*loss; 103 t ash free dry mass y-1); values less than the totals are shown as proportions of the total value.

| **Biomass** | **Percentage** | **2006** | **2007** | **2008** | **2009** | **2010** |
| --- | --- | --- | --- | --- | --- | --- |
| UK effort | 70 | 0.46 | 0.58 | 0.60 | 0.59 | 0.59 |
|  | 80 | 0.60 | 0.71 | 0.73 | 0.73 | 0.70 |
|  | 90 | 0.79 | 0.86 | 0.87 | 0.88 | 0.87 |
|  | 100 | (106.6) | (93.9) | (48.0) | (72.0) | (62.3) |
| Non UK effort | 70 | 0.25 | 0.25 | 0.16 | 0.21 | 0.20 |
|  | 80 | 0.34 | 0.35 | 0.27 | 0.30 | 0.27 |
|  | 90 | 0.50 | 0.55 | 0.49 | 0.47 | 0.44 |
|  | 100 | (165.4) | (184.5) | (152.8) | (139.0) | (145.1) |
| All effort | 70 | 0.23 | 0.25 | 0.16 | 0.21 | 0.18 |
|  | 80 | 0.33 | 0.37 | 0.27 | 0.30 | 0.25 |
|  | 90 | 0.52 | 0.57 | 0.50 | 0.48 | 0.46 |
|  | 100 | (219.5) | (238.7) | (181.2) | (171.0) | (182.7) |
| **Production** | **Percentage** | **2006** | **2007** | **2008** | **2009** | **2010** |
| UK effort | 70 | 0.63 | 0.72 | 0.72 | 0.74 | 0.73 |
|  | 80 | 0.76 | 0.82 | 0.82 | 0.84 | 0.84 |
|  | 90 | 0.76 | 0.82 | 0.82 | 0.84 | 0.84 |
|  | 100 | (30.9) | (25.5) | (11.7) | (19.7) | (15.5) |
| Non UK effort | 70 | 0.42 | 0.42 | 0.36 | 0.40 | 0.38 |
|  | 80 | 0.54 | 0.54 | 0.49 | 0.51 | 0.48 |
|  | 90 | 0.72 | 0.75 | 0.72 | 0.70 | 0.68 |
|  | 100 | (84.0) | (91.0) | (74.7) | (76.6) | (77.9) |
| All effort | 70 | 0.40 | 0.40 | 0.53 | 0.39 | 0.36 |
|  | 80 | 0.53 | 0.55 | 0.49 | 0.51 | 0.47 |
|  | 90 | 0.73 | 0.76 | 0.73 | 0.71 | 0.70 |
|  | 100 | (107.4) | (112.4) | (84.4) | (89.4) | (90.6) |

**Comment on seasonal variation**

Seasonal movements of beam trawling fleets also lead to interactions with habitats of different sensitivity. Poos *et al*. (2010) describe the dynamics of the Netherlands beam trawl fleet, with effort concentrated to the north in autumn when plaice availability peaks and when catches are sufficiently high to offset the higher travel costs of visiting the area. The southern area is visited predominantly in winter when plaice availability peaks. If the plaice quota decreases, total effort in the northern area tends to decrease and effort allocation patterns increasingly resemble those found in the absence of plaice migration, with fishing effort concentrated in the south where sole are also present. Since 1990, Poos *et al*. (2010) report that fishing effort has shifted gradually south by more than a half degree of latitude, a trend that was especially strong in the 1990s. Based on the distribution of sensitivity predicted with our model, this change in the fishery is expected to reduce the environmental impacts of the beam trawl fleet; provided that the effects of any increase in footprint do not exceed the effects of reductions in habitat sensitivity.

Poos, J. J., Bogaards, J. A., Quirijns, F. J., Gillis, D. M., and Rijnsdorp, A. D. 2010. Individual quotas, fishing effort allocation, and over-quota discarding in mixed fisheries. ICES Journal of Marine Science, 67: 323–333.
